# Supplementary material
Source: publisher figshare collection journal article supplement (https://acs.figshare.com/ndownloader/files/4933381)
Supplement: Supplementary file 1 [file 4933381]

## Sheet: Supplementary Table S-3
Supplementarty Table S-3. Differentially expressed proteins in WD1.
Protein AC	Entry Name	Protein Name	Gene Name	Length	Peptide #	Control TIC (log2)	SEM	Cocaine TIC (log2)	SEM	Protein Ratio	SEM	p-value
A0A096MJE6	A0A096MJE6_RAT	Tenascin R, isoform CRA_b (Tenascin-R)	Tnr rCG_46283	1358	31	28.6257	0.0565641	28.2755	0.0515123	0.784515	0.0348711	<0.001
B0BND0	ENPP6_RAT	Ectonucleotide pyrophosphatase/phosphodiesterase family member 6 (E-NPP 6) (NPP-6) (EC 3.1.4.-) (EC 3.1.4.38) (Choline-specific glycerophosphodiester phosphodiesterase) (Glycerophosphocholine cholinephosphodiesterase) (GPC-Cpde)	Enpp6	440	8	23.1144	0.0737429	22.7486	0.164952	0.776006	0.0409185	<0.001
C7E1V2	C7E1V2_RAT	Inositol 1,4,5-trisphosphate receptor type 1	Itpr1	2748	18	25.5901	0.19442	26.0532	0.199976	1.37846	0.0901935	<0.001
D3Z981	D3Z981_RAT	Protein Plxna1	Plxna1 RGD1560871	1894	3	22.8406	0.0880691	23.1785	0.105463	1.26391	0.0581294	<0.05
D3ZC84	D3ZC84_RAT	Ubiquitin carboxyl-terminal hydrolase (EC 3.4.19.12)	Usp9x Usp9x_predicted rCG_42844	2547	8	23.2685	0.117045	23.5984	0.114051	1.2569	0.068109	<0.001
D3ZJH9	D3ZJH9_RAT	Malic enzyme	Me2	584	6	23.2253	0.0934672	23.7299	0.0587126	1.41866	0.029356	<0.001
D3ZVQ0	D3ZVQ0_RAT	Ubiquitin carboxyl-terminal hydrolase (EC 3.4.19.12)	Usp5 LOC100911959 Usp5_predicted rCG_29800	858	17	27.3391	0.0703104	27.6689	0.0387087	1.2569	0.0286738	<0.001
E2RUH2	E2RUH2_RAT	Ribonuclease inhibitor (Ribonuclease/angiogenin inhibitor 1, isoform CRA_a)	Rnh1 LOC100360501 rnase-inh rCG_47479	456	9	23.5979	0.0709714	23.9356	0.0613475	1.26374	0.0429402	<0.001
F1LNB2	F1LNB2_RAT	Phosphatase and actin regulator	Phactr1	580	13	26.4277	0.109686	26.9173	0.0849905	1.40405	0.0409817	<0.001
F1LP01	F1LP01_RAT	Diacylglycerol kinase (DAG kinase) (EC 2.7.1.107)	Dgkb rCG_62181	802	18	26.8139	0.122113	27.2664	0.11349	1.36839	0.0255941	<0.001
F1LPP6	F1LPP6_RAT	A-kinase anchor protein 5	Akap5	714	18	27.9673	0.121808	28.576	0.0991053	1.52491	0.0401494	<0.001
F1LQQ1	F1LQQ1_RAT	Malic enzyme (Fragment)	Me1	549	5	22.7076	0.056232	23.2122	0.0897375	1.41866	0.0435923	<0.001
F1LRK0	F1LRK0_RAT	Clathrin coat assembly protein AP180	Snap91	919	19	29.4428	0.0228242	30.6505	0.0353962	2.30968	0.0250919	<0.001
F1LRZ7	F1LRZ7_RAT	Neurofilament heavy polypeptide	Nefh	1064	24	29.1419	0.126413	28.5999	0.123141	0.686856	0.0577338	<0.001
F1M0Z3	F1M0Z3_RAT	Copine IV (Predicted), isoform CRA_a (Protein Cpne4)	Cpne4 Cpne4_predicted rCG_25293	567	4	21.394	0.273001	22.0061	0.10096	1.52853	0.068716	<0.05
F1M3P6	F1M3P6_RAT	Protein Scai (RCG37693, isoform CRA_b)	Scai LOC100364814 rCG_37693	606	4	21.797	0.135582	21.4623	0.0728286	0.792937	0.0249401	<0.05
F1M5N4	F1M5N4_RAT	Malic enzyme	Me3	605	20	26.685	0.0518301	27.1895	0.0375565	1.41866	0.0260956	<0.001
F1M7Y3	F1M7Y3_RAT	Protein Rap1gds1 (RAP1, GTP-GDP dissociation stimulator 1 (Predicted), isoform CRA_b)	Rap1gds1 Rap1gds1_predicted rCG_28604	478	19	27.1722	0.0393049	26.825	0.0488753	0.786089	0.0343721	<0.001
F1M978	F1M978_RAT	Inositol monophosphatase 1	Impa1	277	6	25.2944	0.0828702	24.8897	0.0704012	0.755401	0.0400796	<0.001
F8WFW5	F8WFW5_RAT	cGMP-dependent 3',5'-cyclic phosphodiesterase	Pde2a	935	20	26.6342	0.0517647	26.9767	0.0452456	1.26793	0.0336312	<0.001
G3V6D3	G3V6D3_RAT	ATP synthase subunit beta (EC 3.6.3.14)	Atp5b rCG_42467	529	41	33.5084	0.0235492	33.8859	0.0277636	1.29912	0.0193462	<0.001
G3V733	G3V733_RAT	Synapsin-2	Syn2	564	28	31.2897	0.0429142	31.6166	0.0358745	1.25436	0.025798	<0.001
G3V8E8	G3V8E8_RAT	Guanine nucleotide-binding protein G(olf) subunit alpha	Gnal	381	11	26.7182	0.13783	27.1972	0.112699	1.39372	0.0436075	<0.001
M0R3X6	M0R3X6_RAT	Carbonyl reductase [NADPH] 1	Cbr1	277	6	26.4318	0.0388408	27.0953	0.0733902	1.58393	0.037867	<0.01
M0R660	M0R660_RAT	Glyceraldehyde-3-phosphate dehydrogenase (EC 1.2.1.12)	RGD1565368	333	23	33.2945	0.015719	32.7214	0.0317632	0.672185	0.0213696	<0.001
M0RDJ7	M0RDJ7_RAT	Protein Tceal5 (RCG20041, isoform CRA_a)	Tceal5 rCG_20041	200	3	24.9204	0.0718359	24.5758	0.107933	0.787532	0.0561375	<0.05
O35303	DNM1L_RAT	Dynamin-1-like protein (EC 3.6.5.5) (Dynamin-like protein)	Dnm1l Dlp1	755	33	27.8899	0.049903	28.375	0.0347769	1.39973	0.0254188	<0.001
O35331	PDXK_RAT	Pyridoxal kinase (EC 2.7.1.35) (Pyridoxine kinase)	Pdxk Pkh	312	5	23.4404	0.0680211	23.8935	0.0735864	1.369	0.0346757	<0.001
O35567	PUR9_RAT	Bifunctional purine biosynthesis protein PURH [Includes: Phosphoribosylaminoimidazolecarboxamide formyltransferase (EC 2.1.2.3) (5-aminoimidazole-4-carboxamide ribonucleotide formyltransferase) (AICAR transformylase); IMP cyclohydrolase (EC 3.5.4.10) (ATIC) (IMP synthase) (Inosinicase)]	Atic Purh	592	12	25.1614	0.05111	25.4879	0.0352286	1.25395	0.0258101	<0.001
O35867	NEB1_RAT	Neurabin-1 (Neurabin-I) (Neural tissue-specific F-actin-binding protein I) (PP1bp175) (Protein phosphatase 1 regulatory subunit 9A) (p180)	Ppp1r9a	1095	23	26.8074	0.077695	27.2788	0.0499627	1.38642	0.0323669	<0.001
O88600	HSP74_RAT	Heat shock 70 kDa protein 4 (Ischemia responsive 94 kDa protein)	Hspa4 Irp94	840	32	28.2312	0.020881	28.6115	0.0365969	1.30156	0.0256821	<0.001
P00507	AATM_RAT	Aspartate aminotransferase, mitochondrial (mAspAT) (EC 2.6.1.1) (EC 2.6.1.7) (Fatty acid-binding protein) (FABP-1) (Glutamate oxaloacetate transaminase 2) (Kynurenine aminotransferase 4) (Kynurenine aminotransferase IV) (Kynurenine--oxoglutarate transaminase 4) (Kynurenine--oxoglutarate transaminase IV) (Plasma membrane-associated fatty acid-binding protein) (FABPpm) (Transaminase A)	Got2 Maat	430	26	30.6584	0.0201402	30.9901	0.0193034	1.25843	0.0130537	<0.001
P01946	HBA_RAT	Hemoglobin subunit alpha-1/2 (Alpha-1/2-globin) (Hemoglobin alpha-1/2 chain)	Hba1 Hba-a1	142	11	33.1676	0.121937	33.6116	0.0806795	1.36036	0.0390096	<0.001
P02091	HBB1_RAT	Hemoglobin subunit beta-1 (Beta-1-globin) (Hemoglobin beta chain, major-form) (Hemoglobin beta-1 chain)	Hbb	147	17	33.0884	0.125906	33.8054	0.0640496	1.64375	0.0349539	<0.001
P02688	MBP_RAT	Myelin basic protein (MBP)	Mbp	195	15	34.0624	0.0718815	33.593	0.0864302	0.722262	0.0437495	<0.001
P04177	TY3H_RAT	Tyrosine 3-monooxygenase (EC 1.14.16.2) (Tyrosine 3-hydroxylase) (TH)	Th	498	14	27.2566	0.19795	27.8451	0.168904	1.50362	0.0491544	<0.001
P04642	LDHA_RAT	L-lactate dehydrogenase A chain (LDH-A) (EC 1.1.1.27) (LDH muscle subunit) (LDH-M)	Ldha Ldh-1 Ldh1	332	20	30.7942	0.0344012	31.2143	0.0282593	1.33803	0.0195777	<0.001
P04797	G3P_RAT	Glyceraldehyde-3-phosphate dehydrogenase (GAPDH) (EC 1.2.1.12) (38 kDa BFA-dependent ADP-ribosylation substrate) (BARS-38) (Peptidyl-cysteine S-nitrosylase GAPDH) (EC 2.6.99.-)	Gapdh Gapd	333	25	33.4254	0.0158067	33.8478	0.0321589	1.34016	0.0218307	<0.001
P05065	ALDOA_RAT	Fructose-bisphosphate aldolase A (EC 4.1.2.13) (Muscle-type aldolase)	Aldoa	364	26	32.2841	0.0348616	32.67	0.0352877	1.30668	0.0241793	<0.001
P06685	AT1A1_RAT	Sodium/potassium-transporting ATPase subunit alpha-1 (Na(+)/K(+) ATPase alpha-1 subunit) (EC 3.6.3.9) (Sodium pump subunit alpha-1)	Atp1a1	1023	39	32.664	0.0315607	32.054	0.0101142	0.655197	0.00674525	<0.001
P07171	CALB1_RAT	Calbindin (Calbindin D28) (D-28K) (Spot 35 protein) (Vitamin D-dependent calcium-binding protein, avian-type)	Calb1	261	15	27.1348	0.118328	27.5812	0.113176	1.36259	0.0424983	<0.001
P07483	FABPH_RAT	Fatty acid-binding protein, heart (Fatty acid-binding protein 3) (Heart-type fatty acid-binding protein) (H-FABP)	Fabp3	133	5	25.3345	0.0903865	24.9755	0.0747494	0.779694	0.0413543	<0.05
P07895	SODM_RAT	Superoxide dismutase [Mn], mitochondrial (EC 1.15.1.1)	Sod2	222	3	25.419	0.0619835	25.9409	0.0502463	1.43586	0.0271703	<0.001
P07936	NEUM_RAT	Neuromodulin (Axonal membrane protein GAP-43) (Growth-associated protein 43) (Protein F1)	Gap43	226	10	29.9989	0.119622	30.5733	0.066991	1.48906	0.0310111	<0.001
P08753	GNAI3_RAT	Guanine nucleotide-binding protein G(k) subunit alpha (G(i) alpha-3)	Gnai3 Gnai-3	354	6	27.367	0.0978284	26.9902	0.0808319	0.770114	0.0427485	<0.001
P10824	GNAI1_RAT	Guanine nucleotide-binding protein G(i) subunit alpha-1 (Adenylate cyclase-inhibiting G alpha protein)	Gnai1 Gnai-1	354	12	28.2075	0.0594764	27.8307	0.0476569	0.770114	0.0335185	<0.001
P10860	DHE3_RAT	Glutamate dehydrogenase 1, mitochondrial (GDH 1) (EC 1.4.1.3) (Memory-related gene 2 protein) (MRG-2)	Glud1 Glud	558	25	29.6051	0.0422208	29.9402	0.0615309	1.26153	0.0504355	<0.001
P11275	KCC2A_RAT	Calcium/calmodulin-dependent protein kinase type II subunit alpha (CaM kinase II subunit alpha) (CaMK-II subunit alpha) (EC 2.7.11.17)	Camk2a	478	23	31.4656	0.0717533	31.1186	0.0664901	0.786228	0.0269084	<0.001
P11348	DHPR_RAT	Dihydropteridine reductase (EC 1.5.1.34) (HDHPR) (Quinoid dihydropteridine reductase)	Qdpr Dhpr	241	15	28.0262	0.0603376	27.5923	0.106276	0.740246	0.0321945	<0.05
P11507	AT2A2_RAT	Sarcoplasmic/endoplasmic reticulum calcium ATPase 2 (SERCA2) (SR Ca(2+)-ATPase 2) (EC 3.6.3.8) (Calcium pump 2) (Calcium-transporting ATPase sarcoplasmic reticulum type, slow twitch skeletal muscle isoform) (Endoplasmic reticulum class 1/2 Ca(2+) ATPase)	Atp2a2	1043	34	28.2299	0.0434511	27.7974	0.0697333	0.740977	0.0345633	<0.001
P11517	HBB2_RAT	Hemoglobin subunit beta-2 (Beta-2-globin) (Hemoglobin beta chain, minor-form) (Hemoglobin beta-2 chain)	0	147	15	32.5709	0.127186	32.9315	0.066734	1.284	0.044888	<0.001
P11730	KCC2G_RAT	Calcium/calmodulin-dependent protein kinase type II subunit gamma (CaM kinase II subunit gamma) (CaMK-II subunit gamma) (EC 2.7.11.17)	Camk2g	527	15	30.6847	0.0716047	30.0406	0.0622041	0.639912	0.0232782	<0.01
P12369	KAP3_RAT	cAMP-dependent protein kinase type II-beta regulatory subunit	Prkar2b	416	18	28.7411	0.0803921	29.1484	0.064033	1.32626	0.0366817	<0.001
P12785	FAS_RAT	Fatty acid synthase (EC 2.3.1.85) [Includes: [Acyl-carrier-protein] S-acetyltransferase (EC 2.3.1.38); [Acyl-carrier-protein] S-malonyltransferase (EC 2.3.1.39); 3-oxoacyl-[acyl-carrier-protein] synthase (EC 2.3.1.41); 3-oxoacyl-[acyl-carrier-protein] reductase (EC 1.1.1.100); 3-hydroxyacyl-[acyl-carrier-protein] dehydratase (EC 4.2.1.59); Enoyl-[acyl-carrier-protein] reductase (EC 1.3.1.39); Ole…	Fasn	2505	23	25.4865	0.0576289	25.8525	0.0516144	1.28874	0.0354198	<0.001
P12839	NFM_RAT	Neurofilament medium polypeptide (NF-M) (160 kDa neurofilament protein) (Neurofilament 3) (Neurofilament triplet M protein)	Nefm Nef3 Nfm	846	30	30.1137	0.116674	29.6453	0.115225	0.722786	0.0666551	<0.001
P13221	AATC_RAT	Aspartate aminotransferase, cytoplasmic (cAspAT) (EC 2.6.1.1) (EC 2.6.1.3) (Cysteine aminotransferase, cytoplasmic) (Cysteine transaminase, cytoplasmic) (cCAT) (Glutamate oxaloacetate transaminase 1) (Transaminase A)	Got1	413	18	28.4526	0.0855647	28.8619	0.0995602	1.32799	0.0566721	<0.001
P13233	CN37_RAT	2',3'-cyclic-nucleotide 3'-phosphodiesterase (CNP) (CNPase) (EC 3.1.4.37)	Cnp Cnp1	420	27	32.9999	0.0697823	32.6774	0.101429	0.799682	0.02805	<0.001
P18088	DCE1_RAT	Glutamate decarboxylase 1 (EC 4.1.1.15) (67 kDa glutamic acid decarboxylase) (GAD-67) (Glutamate decarboxylase 67 kDa isoform)	Gad1 Gad67	593	4	23.9026	0.0487462	24.2364	0.0772793	1.2603	0.0562196	<0.01
P19234	NDUV2_RAT	NADH dehydrogenase [ubiquinone] flavoprotein 2, mitochondrial (EC 1.6.5.3) (EC 1.6.99.3) (NADH-ubiquinone oxidoreductase 24 kDa subunit)	Ndufv2	248	8	27.2406	0.0504615	27.5741	0.0223538	1.26002	0.0157355	<0.001
P19527	NFL_RAT	Neurofilament light polypeptide (NF-L) (68 kDa neurofilament protein) (Neurofilament triplet L protein)	Nefl Nf68 Nfl	542	33	30.5571	0.111086	30.0642	0.111728	0.710573	0.0555502	<0.001
P23977	SC6A3_RAT	Sodium-dependent dopamine transporter (DA transporter) (DAT) (Solute carrier family 6 member 3)	Slc6a3	619	5	23.3846	0.254433	24.1259	0.22119	1.67168	0.074193	<0.001
P30009	MARCS_RAT	Myristoylated alanine-rich C-kinase substrate (MARCKS) (Protein kinase C substrate 80 kDa protein)	Marcks Macs	309	11	28.8774	0.0841871	29.2505	0.143638	1.29515	0.0409245	<0.01
P31977	EZRI_RAT	Ezrin (Cytovillin) (Villin-2) (p81)	Ezr Vil2	586	10	24.2761	0.0846584	23.7159	0.0832642	0.678229	0.0473095	<0.001
P35234	PTN5_RAT	Tyrosine-protein phosphatase non-receptor type 5 (EC 3.1.3.48) (Neural-specific protein-tyrosine phosphatase) (Striatum-enriched protein-tyrosine phosphatase) (STEP)	Ptpn5	369	8	25.0929	0.124349	25.6691	0.126282	1.4909	0.0482224	<0.001
P37805	TAGL3_RAT	Transgelin-3 (Neuronal protein 22) (NP22) (Neuronal protein NP25)	Tagln3 Np25	199	12	27.5083	0.0797249	27.1365	0.0411357	0.772826	0.0251701	<0.001
P39069	KAD1_RAT	Adenylate kinase isoenzyme 1 (AK 1) (EC 2.7.4.3) (EC 2.7.4.6) (ATP-AMP transphosphorylase 1) (ATP:AMP phosphotransferase) (Adenylate monophosphate kinase) (Myokinase)	Ak1	194	9	26.2625	0.187778	25.0319	0.18102	0.426147	0.0984544	<0.001
P41542	USO1_RAT	General vesicular transport factor p115 (Protein USO1 homolog) (Transcytosis-associated protein) (TAP) (Vesicle-docking protein)	Uso1 Vdp	959	8	23.6336	0.0538963	23.2828	0.0585024	0.784133	0.0384882	<0.01
P43425	GBG7_RAT	Guanine nucleotide-binding protein G(I)/G(S)/G(O) subunit gamma-7	Gng7 Gngt7	68	6	28.3304	0.180329	28.7964	0.173866	1.38127	0.0447728	<0.001
P45592	COF1_RAT	Cofilin-1 (Cofilin, non-muscle isoform)	Cfl1	166	12	30.6675	0.0224462	31.1563	0.0206597	1.4033	0.014159	<0.001
P47728	CALB2_RAT	Calretinin (CR)	Calb2	271	7	26.0647	0.114668	26.5066	0.0873853	1.35843	0.0410735	<0.001
P47819	GFAP_RAT	Glial fibrillary acidic protein (GFAP)	Gfap	430	20	29.0057	0.0672263	28.3986	0.132026	0.656502	0.0252309	<0.001
P48721	GRP75_RAT	Stress-70 protein, mitochondrial (75 kDa glucose-regulated protein) (GRP-75) (Heat shock 70 kDa protein 9) (Mortalin) (Peptide-binding protein 74) (PBP74) (mtHSP70)	Hspa9 Grp75 Hspa9a	679	21	28.4823	0.0391746	28.8236	0.0429057	1.26685	0.0305703	<0.001
P50411	IPP2_RAT	Protein phosphatase inhibitor 2 (IPP-2)	Ppp1r2 Ipp2	205	2	20.4793	0.322555	20.979	0.198455	1.41385	0.0640013	<0.001
P50503	F10A1_RAT	Hsc70-interacting protein (Hip) (Protein FAM10A1) (Protein ST13 homolog)	St13 Fam10a1 Hip	368	7	25.2809	0.0578366	25.6193	0.03987	1.26434	0.0297387	<0.001
P50554	GABT_RAT	4-aminobutyrate aminotransferase, mitochondrial (EC 2.6.1.19) ((S)-3-amino-2-methylpropionate transaminase) (EC 2.6.1.22) (GABA aminotransferase) (GABA-AT) (Gamma-amino-N-butyrate transaminase) (GABA transaminase) (GABA-T) (L-AIBAT) [Cleaved into: 4-aminobutyrate aminotransferase, brain isoform; 4-aminobutyrate aminotransferase, liver isoform]	Abat Gabat	500	25	30.1333	0.0879226	30.5077	0.0888274	1.29627	0.0304064	<0.001
P54313	GBB2_RAT	Guanine nucleotide-binding protein G(I)/G(S)/G(T) subunit beta-2 (G protein subunit beta-2) (Transducin beta chain 2)	Gnb2	340	13	29.8958	0.0687238	29.483	0.0769561	0.751191	0.046829	<0.001
P56574	IDHP_RAT	Isocitrate dehydrogenase [NADP], mitochondrial (IDH) (EC 1.1.1.42) (ICD-M) (IDP) (NADP(+)-specific ICDH) (Oxalosuccinate decarboxylase)	Idh2	452	9	24.6543	0.10922	24.2075	0.0744593	0.733643	0.0243753	<0.001
P61023	CHP1_RAT	Calcineurin B homologous protein 1 (Calcineurin B-like protein) (Calcium-binding protein CHP) (Calcium-binding protein p22) (EF-hand calcium-binding domain-containing protein p22)	Chp1 Chp	195	3	22.7654	0.121325	22.3174	0.115202	0.733084	0.0375293	<0.05
P61107	RAB14_RAT	Ras-related protein Rab-14	Rab14	215	10	27.7297	0.0691144	28.1128	0.0594842	1.30418	0.0404888	<0.001
P61983	1433G_RAT	14-3-3 protein gamma [Cleaved into: 14-3-3 protein gamma, N-terminally processed]	Ywhag	247	14	31.4776	0.0645535	31.0798	0.0379109	0.759019	0.0296576	<0.001
P62260	1433E_RAT	14-3-3 protein epsilon (14-3-3E) (Mitochondrial import stimulation factor L subunit) (MSF L)	Ywhae	255	27	31.8884	0.0738689	32.3054	0.0349018	1.33517	0.0267151	<0.01
P62762	VISL1_RAT	Visinin-like protein 1 (VILIP) (21 kDa CABP) (Neural visinin-like protein 1) (NVL-1) (NVP-1)	Vsnl1 Visl1	191	15	28.7569	0.110708	28.3257	0.0910502	0.741662	0.0457753	<0.001
P63018	HSP7C_RAT	Heat shock cognate 71 kDa protein (Heat shock 70 kDa protein 8)	Hspa8 Hsc70 Hsc73	646	41	32.3686	0.00900011	32.7496	0.0118438	1.30222	0.00828352	<0.001
P63102	1433Z_RAT	14-3-3 protein zeta/delta (Mitochondrial import stimulation factor S1 subunit) (Protein kinase C inhibitor protein 1) (KCIP-1)	Ywhaz Msfs1	245	20	32.9396	0.0409513	33.2858	0.0296143	1.27124	0.0227543	<0.001
P63329	PP2BA_RAT	Serine/threonine-protein phosphatase 2B catalytic subunit alpha isoform (EC 3.1.3.16) (CAM-PRP catalytic subunit) (Calmodulin-dependent calcineurin A subunit alpha isoform)	Ppp3ca Calna	521	19	30.215	0.0457907	30.6148	0.0574339	1.31935	0.0366942	<0.001
P63331	PP2AA_RAT	Serine/threonine-protein phosphatase 2A catalytic subunit alpha isoform (PP2A-alpha) (EC 3.1.3.16)	Ppp2ca	309	14	27.2894	0.0323984	27.6392	0.0331828	1.27439	0.0233229	<0.001
Q01066	PDE1B_RAT	Calcium/calmodulin-dependent 3',5'-cyclic nucleotide phosphodiesterase 1B (Cam-PDE 1B) (EC 3.1.4.17) (63 kDa Cam-PDE)	Pde1b Pde1b1	535	20	27.7881	0.188982	28.5032	0.152565	1.64153	0.0570432	<0.001
Q03555	GEPH_RAT	Gephyrin (Putative glycine receptor-tubulin linker protein) [Includes: Molybdopterin adenylyltransferase (MPT adenylyltransferase) (EC 2.7.7.75) (Domain G); Molybdopterin molybdenumtransferase (MPT Mo-transferase) (EC 2.10.1.1) (Domain E)]	Gphn Gph	768	14	25.5124	0.0674607	25.91	0.0659822	1.31729	0.0454206	<0.001
Q04400	ADCY5_RAT	Adenylate cyclase type 5 (EC 4.6.1.1) (ATP pyrophosphate-lyase 5) (Adenylate cyclase type V) (Adenylyl cyclase 5)	Adcy5	1262	11	27.0145	0.187804	27.4586	0.128513	1.36045	0.0396465	<0.001
Q08163	CAP1_RAT	Adenylyl cyclase-associated protein 1 (CAP 1)	Cap1 Cap Mch1	474	19	29.1134	0.0696525	29.5171	0.0447435	1.32294	0.0316594	<0.001
Q09073	ADT2_RAT	ADP/ATP translocase 2 (ADP,ATP carrier protein 2) (Adenine nucleotide translocator 2) (ANT 2) (Solute carrier family 25 member 5) [Cleaved into: ADP/ATP translocase 2, N-terminally processed]	Slc25a5 Ant2	298	17	30.6129	0.066628	30.1324	0.0712244	0.716739	0.0341794	<0.001
Q2TA68	OPA1_RAT	Dynamin-like 120 kDa protein, mitochondrial (EC 3.6.5.5) (Optic atrophy protein 1 homolog) [Cleaved into: Dynamin-like 120 kDa protein, form S1]	Opa1	960	22	26.0304	0.192951	26.3687	0.103627	1.26426	0.0221024	<0.001
Q4FZY0	EFHD2_RAT	EF-hand domain-containing protein D2 (Swiprosin-1)	Efhd2 Sws1	239	8	25.2866	0.127227	24.6438	0.123922	0.640473	0.0721617	<0.001
Q4G079	Q4G079_RAT	Protein Aimp1 (Small inducible cytokine subfamily E, member 1)	Aimp1 Scye1 rCG_28432	315	2	17.9242	0.181815	17.3306	0.199961	0.662695	0.0263419	<0.05
Q4V7C7	ARP3_RAT	Actin-related protein 3 (Actin-like protein 3)	Actr3 Arp3	418	13	27.7564	0.0280589	28.3303	0.0282485	1.48862	0.0196926	<0.001
Q561S0	NDUAA_RAT	NADH dehydrogenase [ubiquinone] 1 alpha subcomplex subunit 10, mitochondrial (Complex I-42kD) (CI-42kD) (NADH-ubiquinone oxidoreductase 42 kDa subunit)	Ndufa10	355	12	28.462	0.0344365	28.8078	0.0286743	1.27087	0.0192207	<0.001
Q5BJZ3	Q5BJZ3_RAT	Nicotinamide nucleotide transhydrogenase (Protein Nnt)	Nnt	1086	6	23.3557	0.0649223	23.8266	0.0374344	1.38594	0.0268405	<0.001
Q5FVI6	VATC1_RAT	V-type proton ATPase subunit C 1 (V-ATPase subunit C 1) (Vacuolar proton pump subunit C 1)	Atp6v1c1	382	14	26.692	0.0346948	27.1456	0.0421097	1.36945	0.0277829	<0.05
Q5M7T6	Q5M7T6_RAT	ATPase, H+ transporting, lysosomal 38kDa, V0 subunit d1 (Protein Atp6v0d1) (RCG51062, isoform CRA_a)	Atp6v0d1 rCG_51062	351	14	29.166	0.0439307	29.6749	0.0431434	1.42294	0.030058	<0.001
Q5U2N2	Q5U2N2_RAT	Ubiquitin carboxyl-terminal hydrolase (EC 3.4.19.12)	Usp14 rCG_41276	493	5	23.0601	0.0545527	23.39	0.0470883	1.2569	0.0307559	<0.001
Q5XIN6	LETM1_RAT	LETM1 and EF-hand domain-containing protein 1, mitochondrial (Leucine zipper-EF-hand-containing transmembrane protein 1)	Letm1	739	17	26.6518	0.0405705	27.0457	0.0412584	1.31395	0.0277109	<0.001
Q63910	Q63910_RAT	Alpha globin (Protein LOC287167) (RCG33691)	LOC287167 GloA rCG_33691	142	6	28.4052	0.167757	28.8467	0.0994028	1.358	0.0495171	<0.01
Q641Y2	NDUS2_RAT	NADH dehydrogenase [ubiquinone] iron-sulfur protein 2, mitochondrial (EC 1.6.5.3) (EC 1.6.99.3) (Complex I-49kD) (CI-49kD) (NADH-ubiquinone oxidoreductase 49 kDa subunit)	Ndufs2	463	12	27.3437	0.0379565	27.7376	0.0313607	1.31397	0.0220631	<0.001
Q64548	RTN1_RAT	Reticulon-1 (Neuroendocrine-specific protein) (S-rex)	Rtn1 Nsp	777	23	28.6677	0.0360306	28.335	0.0284088	0.794029	0.0215225	<0.05
Q64548	RTN1_RAT	Reticulon-1 (Neuroendocrine-specific protein) (S-rex)	Rtn1 Nsp	777	23	28.6677	0.0360306	28.335	0.0284088	0.794029	0.0215225	<0.05
Q66H62	CYLD_RAT	Ubiquitin carboxyl-terminal hydrolase CYLD (EC 3.4.19.12) (Deubiquitinating enzyme CYLD) (Ubiquitin thioesterase CYLD) (Ubiquitin-specific-processing protease CYLD)	Cyld Cyld1	953	5	22.7931	0.106969	23.2228	0.128841	1.34695	0.0311239	<0.001
Q66HA8	HS105_RAT	Heat shock protein 105 kDa (Heat shock 110 kDa protein)	Hsph1 Hsp105 Hsp110	858	26	27.7348	0.0447228	28.0845	0.0543503	1.27422	0.0385485	<0.001
Q66HF8	AL1B1_RAT	Aldehyde dehydrogenase X, mitochondrial (EC 1.2.1.3) (Aldehyde dehydrogenase family 1 member B1)	Aldh1b1 Aldhx	519	10	25.275	0.109513	25.6528	0.104707	1.29936	0.0423737	<0.001
Q68FX0	IDH3B_RAT	Isocitrate dehydrogenase [NAD] subunit beta, mitochondrial (EC 1.1.1.41) (Isocitric dehydrogenase subunit beta) (NAD(+)-specific ICDH subunit beta)	Idh3B	385	20	28.5949	0.0478232	29.0236	0.035639	1.34601	0.026323	<0.001
Q68G16	Q68G16_RAT	Serine/threonine-protein phosphatase (EC 3.1.3.16)	Ppp5c	499	5	23.7811	0.0536684	24.1957	0.0508378	1.33295	0.0339649	<0.001
Q6P7Q4	LGUL_RAT	Lactoylglutathione lyase (EC 4.4.1.5) (Aldoketomutase) (Glyoxalase I) (Glx I) (Ketone-aldehyde mutase) (Methylglyoxalase) (S-D-lactoylglutathione methylglyoxal lyase)	Glo1	184	12	27.0499	0.0858364	26.6118	0.0767816	0.738085	0.040512	<0.001
Q6P7S6	Q6P7S6_RAT	Clusterin	Clu	447	4	22.9183	0.0564762	23.4737	0.0750139	1.46958	0.0268683	<0.001
Q6T487	Q6T487_RAT	Brain-specific alpha actinin 1 isoform	Actn1	914	54	29.8557	0.046571	30.243	0.0858729	1.30794	0.0279908	<0.001
Q75Q39	TOM70_RAT	Mitochondrial import receptor subunit TOM70 (Mitochondrial precursor proteins import receptor) (Translocase of outer membrane 70 kDa subunit)	Tomm70a	610	25	28.6161	0.0881667	29.0255	0.0990309	1.32815	0.052128	<0.001
Q7TP75	Q7TP75_RAT	Aa2-066	Ahsg	553	3	24.3717	0.162088	24.8416	0.0645066	1.385	0.0370384	<0.01
Q7TP78	Q7TP78_RAT	Aa2-258 (Protein Ndufa8)	Ndufa8	189	3	25.7755	0.0778807	26.2266	0.0671522	1.367	0.0296613	<0.001
Q810C5	Q810C5_RAT	Diacylglycerol kinase (DAG kinase) (EC 2.7.1.107)	Dgki rDGKi-1	1050	3	22.0531	0.169015	22.4601	0.133438	1.32587	0.05743	<0.01
Q8VD52	PLPP_RAT	Pyridoxal phosphate phosphatase (PLP phosphatase) (EC 3.1.3.3) (EC 3.1.3.74) (Chronophin) (Reg I-binding protein 1)	Pdxp Cin Plp Plpp Rbp1	309	7	26.2622	0.162992	26.6221	0.0647897	1.28332	0.0374095	<0.001
Q91Y81	SEPT2_RAT	Septin-2 (Vascular endothelial cell specific protein 11)	Sept2 Vesp11	361	10	26.5679	0.063444	27.0492	0.0439968	1.39599	0.0308142	<0.001
Q920L2	SDHA_RAT	Succinate dehydrogenase [ubiquinone] flavoprotein subunit, mitochondrial (EC 1.3.5.1) (Flavoprotein subunit of complex II) (Fp)	Sdha	656	23	28.95	0.0308935	29.3024	0.035274	1.27671	0.0254493	<0.001
Q9ERH3	WDR7_RAT	WD repeat-containing protein 7 (TGF-beta resistance-associated protein TRAG)	Wdr7 Trag	1488	24	26.1554	0.0230078	26.5382	0.038416	1.30392	0.0270911	<0.001
Q9ESB4	Q9ESB4_RAT	Neuronal calcium binding protein NECAB2	Necab2 Efcbp2	352	8	24.2419	0.17265	24.7216	0.128327	1.39444	0.0507573	<0.001
Q9JHU0	DPYL5_RAT	Dihydropyrimidinase-related protein 5 (DRP-5) (UNC33-like phosphoprotein 6) (ULIP-6)	Dpysl5 Ulip6	564	20	28.9788	0.0890871	29.3826	0.062442	1.32299	0.0427777	<0.001
Q9JLU4	SHAN3_RAT	SH3 and multiple ankyrin repeat domains protein 3 (Shank3) (Proline-rich synapse-associated protein 2) (ProSAP2) (SPANK-2)	Shank3 Prosap2	1740	29	26.3973	0.0955553	26.9153	0.0964249	1.43194	0.0404681	<0.001
Q9JMB3	Q9JMB3_RAT	Erythrocyte protein band 4.1-like 3, isoform CRA_d (Protein Epb41l3) (Type II brain 4.1)	Epb41l3 Epb4.1l3 rCG_35644	1105	35	28.0551	0.0505084	27.687	0.0532783	0.774787	0.0377961	<0.001
Q9QX69	LANC1_RAT	LanC-like protein 1 (40 kDa erythrocyte membrane protein) (p40)	Lancl1 Gpr69a	399	7	25.4316	0.0790787	25.854	0.114681	1.34017	0.0527841	<0.05
Q9R080	GPSM1_RAT	G-protein-signaling modulator 1 (Activator of G-protein signaling 3)	Gpsm1 Ags3	673	5	21.9242	0.100048	22.3038	0.0789109	1.30098	0.040104	<0.01
Q9WTP0	E41L1_RAT	Band 4.1-like protein 1 (Neuronal protein 4.1) (4.1N)	Epb41l1 Epb4.1l1	879	26	27.2128	0.0539546	27.5634	0.0384961	1.27502	0.0288192	<0.001
Q9WUW2	Q9WUW2_RAT	Vesicle associated membrane protein 2B	Vamp2 vamp2	135	6	28.2293	0.205226	28.7576	0.128975	1.44226	0.0384024	<0.001
